# Supplementary material for: Response of Strawberry Fruit Yield, Soil Chemical and Microbial Properties to Anaerobic Soil Disinfestation with Biochar and Rice Bran
Source: MDPI journal article supplement (doi:10.3390/agriculture13071466), 2023-07-24
Supplement: s1 [file s1]

## Supporting information

### Table legends

Table S1. Approximate number of soil-borne pathogens before soil anaerobic disinfestation

Table S2. Properties of rice bran and biochar materials

Table S3. Culture medium composition (making 2 L of culture medium)<sup>a</sup>

Table S4. Soil-borne pathogen abundance and mortality 10 days in the different treatments<sup>a</sup>

Table S5. Soil-borne pathogen abundance 120 days in the different treatments<sup>a</sup>

Table S6. Strawberry plant height, stem diameter and plant mortality, and strawberry fruit yield in the different treatments<sup>a</sup>

**Table S1.** Approximate number of soil-borne pathogens before soil anaerobic disinfestation.

| Greenhouses | <i>Fusarium</i> spp. (cfu/g soil) | <i>Phytophthora</i> spp. (cfu/g soil) |
|-------------|-----------------------------------|---------------------------------------|
| Trial I     | 4,955                             | 6,539                                 |
| Trial II    | 4,955                             | 6,789                                 |

**Table S2.** Properties of rice bran and biochar materials.

| Material  | Feedstock                      | Pyrolysis Temp. (°C) | C (%) | N (%) | C/N   | Source                                          |
|-----------|--------------------------------|----------------------|-------|-------|-------|-------------------------------------------------|
| Rice bran | By-products of rice processing | None applied         | 41.93 | 1.47  | 28.52 | Chengde Rice Processing Factory, Hebei, China.. |
| Biochar   | Rice husk charcoal             | ~500                 | 50.43 | 0.93  | 54.23 | Huateng Biochar Co., Ltd., Guizhou, China.      |

**Table S3.** Culture medium composition (making 2 L of culture medium)<sup>a</sup>

|                          | Ingredients | Composition                                                                                                                                                                     |
|--------------------------|-------------|---------------------------------------------------------------------------------------------------------------------------------------------------------------------------------|
|                          | A           | K <sub>2</sub> HPO <sub>4</sub> (2 g), KCl (1 g), MgSO <sub>4</sub> (1 g), L-Asparagine (4 g), D Galactose (40 g), Agar (30 g).                                                 |
| <i>Fusarium</i> spp.     | B           | Fe-Na EDTA (0.02 g), Na <sub>2</sub> B <sub>4</sub> O <sub>7</sub> ·10H <sub>2</sub> O (2 g), Oxgall (1 g), Streptomycin sulfate (1 g), Pentachloronitrobenzene (PCNB) (1.5 g). |
|                          | A           | Agar (34 g), Glucose (40 g).                                                                                                                                                    |
| <i>Phytophthora</i> spp. | B           | Pentachloronitrobenzene (PCNB) (0.15 g), Ampicillin (0.03 g), Rifampicina (0.02 g).                                                                                             |

<sup>a</sup> Take the amount of 2 L as an example. The ingredients in A were added to 1.9 L distilled water, boiled, packed and then sterilized. The ingredients in B were directly added to 100 mL of sterilized water and shaken.

**Table S4.** Soil-borne pathogen abundance and mortality 10 days in the different treatments<sup>a</sup>.

| Treat<br>ment | Trial I                                          |                  |                                                       |                  | Trial II                             |                  |                                                        |                  |
|---------------|--------------------------------------------------|------------------|-------------------------------------------------------|------------------|--------------------------------------|------------------|--------------------------------------------------------|------------------|
|               | <i>Fusarium</i><br><i>m</i> spp.<br>(cfu/g soil) | Mortality<br>(%) | <i>Phytophthora</i><br><i>ra</i> spp.<br>(cfu/g soil) | Mortality<br>(%) | <i>Fusarium</i><br>spp. (cfu/g soil) | Mortality<br>(%) | <i>Phytophthora</i><br><i>ora</i> spp.<br>(cfu/g soil) | Mortality<br>(%) |
| CK            | 2108±314a                                        | /                | 3312±424a                                             | /                | 10255±1284a                          | /                | 9078±539a                                              | /                |
| ST            | 532±105b                                         | 74.76            | 484±39b                                               | 85.39            | 3173±285b                            | 69.06            | 3338±398b                                              | 63.23            |
| RB10          | 285±69bc                                         | 86.48            | 225±16bc                                              | 93.21            | 349±92c                              | 96.60            | 208±38d                                                | 97.71            |
| RB20          | 316±37bc                                         | 85.01            | 269±67bc                                              | 91.88            | 424±58c                              | 95.87            | 368±14d                                                | 95.95            |
| BC5           | 458±70b                                          | 78.27            | 354±19bc                                              | 89.31            | 1082±141c                            | 89.45            | 1190±147c                                              | 86.89            |
| BC10          | 165±20c                                          | 92.17            | 87±13c                                                | 97.37            | 145±19c                              | 98.59            | 159±38d                                                | 98.25            |

<sup>a</sup> Means (N = 3) within the same column accompanied by the different letters indicate significant differences between treatments ( $P \leq 0.05$ ). CK=No rice bran or biochar added to the soil and no film applied; ST=Soil covered by TIF without rice bran or biochar; RB10=10 t/ha rice bran plus TIF; RB20=20 t/ha rice bran plus TIF; BC5=5 t/ha biochar plus TIF; BC10=10 t/ha biochar plus TIF.

**Table S5.** Soil-borne pathogen abundance 120 days in the different treatments<sup>a</sup>.

| Treatment | Trial I              |                          | Trial II             |                      |
|-----------|----------------------|--------------------------|----------------------|----------------------|
|           | <i>Fusarium</i> spp. | <i>Phytophthora</i> spp. | <i>Fusarium</i> spp. | <i>Phytophthora</i>  |
|           | (cfu/g soil)         | (cfu/g soil)             | (cfu/g soil)         | spp.<br>(cfu/g soil) |
| CK        | 1070±49a             | 1275±58a                 | 1290±79a             | 2514±57a             |
| ST        | 1079±30a             | 1268±48a                 | 1238±30a             | 2503±88a             |
| RB10      | 1008±16a             | 1242±55a                 | 1246±61a             | 2459±44a             |
| RB20      | 1041±48a             | 1253±50a                 | 1284±85a             | 2480±69a             |
| BC5       | 1044±45a             | 1297±48a                 | 1311±71a             | 2460±52a             |
| BC10      | 1043±43a             | 1206±51a                 | 1200±35a             | 2447±6a              |

<sup>a</sup> Means (N = 3) within the same column accompanied by the different letters indicate significant differences between treatments ( $P \leq 0.05$ ). The treatments are described in Table S3.

**Table S6.** Strawberry plant height, stem diameter and plant mortality, and strawberry fruit yield in the different treatments<sup>a</sup>.

| Treat<br>ment | Trial I                 |                          |                               |                                            | Trial II                |                              |                               |                                         |
|---------------|-------------------------|--------------------------|-------------------------------|--------------------------------------------|-------------------------|------------------------------|-------------------------------|-----------------------------------------|
|               | Plant<br>height<br>(cm) | Stem<br>diameter<br>(mm) | Plant<br>mortalit<br>y<br>(%) | Strawb<br>erry<br>fruit<br>yield<br>(t/ha) | Plant<br>height<br>(cm) | Stem<br>diamete<br>r<br>(mm) | Plant<br>mortalit<br>y<br>(%) | Strawbe<br>rry fruit<br>yield<br>(t/ha) |
| CK            | 14.25±0.<br>73b         | 18.58±0.6<br>8b          | 11.50±1.<br>29a               | 2.35±0.<br>23e                             | 26.58±2.<br>36c         | 23.46±0.<br>53b              | 8.75±0.9<br>6a                | 2.85±0.1<br>0e                          |
| ST            | 19.59±1.<br>80a         | 21.92±1.7<br>4ab         | 6.75±0.9<br>6b                | 3.46±0.<br>20d                             | 29.35±3.<br>33bc        | 30.86±3.<br>37a              | 6.50±0.5<br>8b                | 3.97±0.0<br>8d                          |
| RB10          | 18.49±2.<br>80a         | 18.94±2.3<br>5ab         | 5.00±1.4<br>1c                | 4.90±0.<br>13b                             | 33.50±3.<br>84a         | 29.56±1.<br>72a              | 4.75±0.9<br>6c                | 5.40±0.2<br>0b                          |
| RB20          | 18.49±3.<br>19a         | 21.18±6.2<br>3ab         | 2.25±0.5<br>0d                | 4.17±0.<br>38c                             | 33.08±1.<br>51ab        | 31.15±3.<br>14a              | 2.25±0.9<br>6d                | 4.67±0.1<br>5c                          |
| BC5           | 20.00±3.<br>16a         | 20.84±4.0<br>2ab         | 2.75±0.9<br>6d                | 3.69±0.<br>08d                             | 32.85±1.<br>70ab        | 31.30±3.<br>58a              | 2.25±0.5<br>0d                | 4.21±0.2<br>1d                          |
| BC10          | 21.15±2.<br>29a         | 24.73±3.9<br>7a          | 3.00±1.4<br>1d                | 5.45±0.<br>29a                             | 34.16±1.<br>11a         | 33.04±1.<br>97a              | 1.75±0.5<br>0d                | 5.96±0.0<br>7a                          |

<sup>a</sup> Means (N = 3) within the same column accompanied by the different letters indicate significant differences between treatments ( $P \leq 0.05$ ). The treatments are described in Table S3.

## Figure legends

Figure S1. Nonmetric Multidimensional Scale Analysis of soil (A) bacterial and (B) fungal communities exposed to different treatments.

Figure S2. Heatmap analysis of correlations between soil (A) bacterial and (B) fungal communities at the genus level with soil physicochemical properties.

Figure S3. Ordinal regression analysis of alpha diversity and pH of soil bacterial (A, C) and fungal (B, D) communities. R<sup>2</sup> is the coefficient of determination which represents the proportion of variation explained by the regression line.

Figure S4. Correlation analysis between strawberry yield and soil physicochemical properties.

Figure S5. Correlation analysis between strawberry yield and soil-borne pathogens.

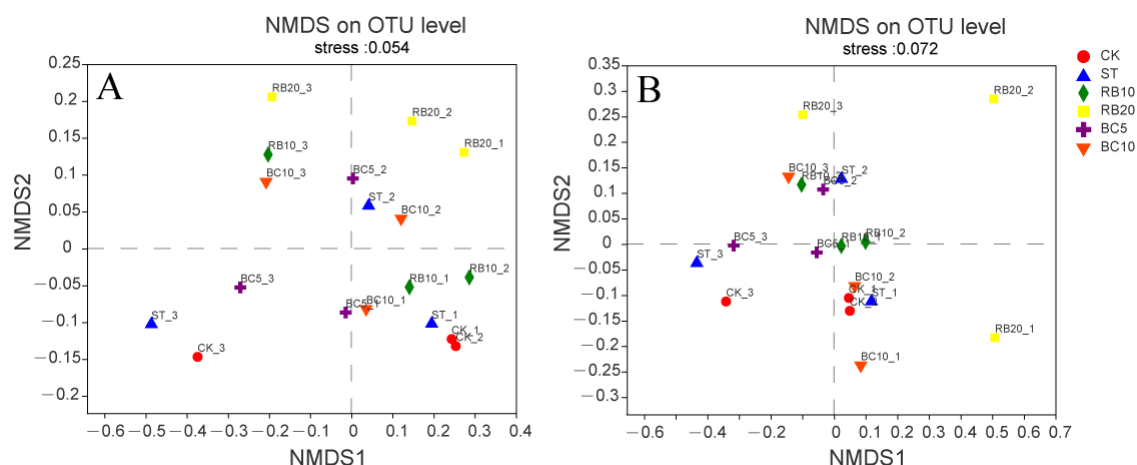

**Figure S1.** Nonmetric Multidimensional Scale Analysis of soil (A) bacterial and (B) fungal communities exposed to different treatments. CK=No rice bran or biochar added to the soil and no film applied; ST=Soil covered by TIF without rice bran or biochar; RB10=10 t/ha rice bran plus TIF; RB20=20 t/ha rice bran plus TIF; BC5=5 t/ha biochar plus TIF; BC10=10 t/ha biochar plus TIF.

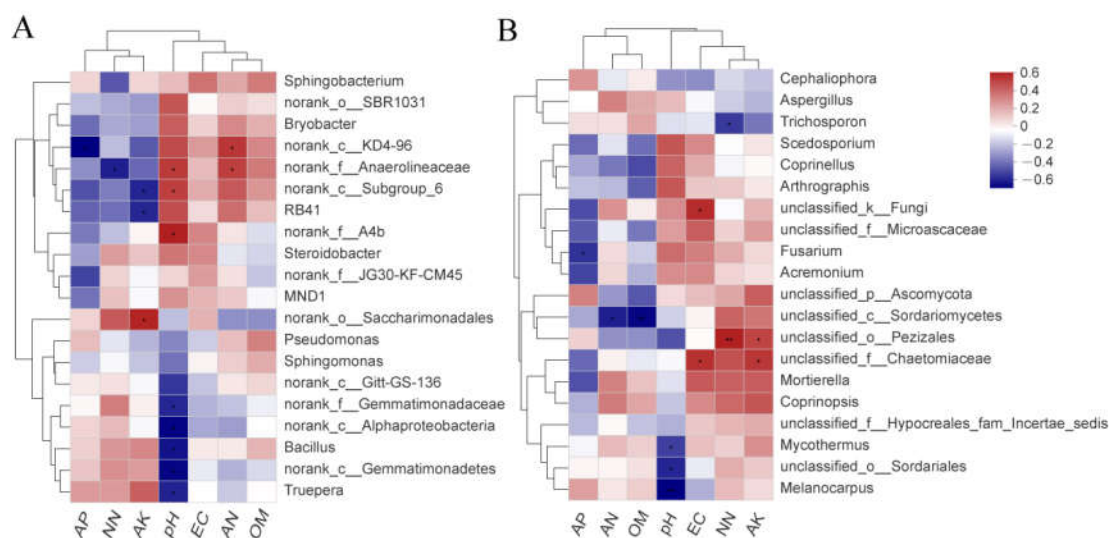

**Figure S2.** Heatmap analysis of correlations between soil (A) bacterial and (B) fungal communities at the genus level with soil physicochemical properties. Correlation analysis was performed using Spearman's rank correlation method. Red represents a positive correlation and blue represents a negative correlation. Significance levels: \*  $p < 0.05$ , \*\*  $p < 0.01$ . The treatments are described in Figure S1.

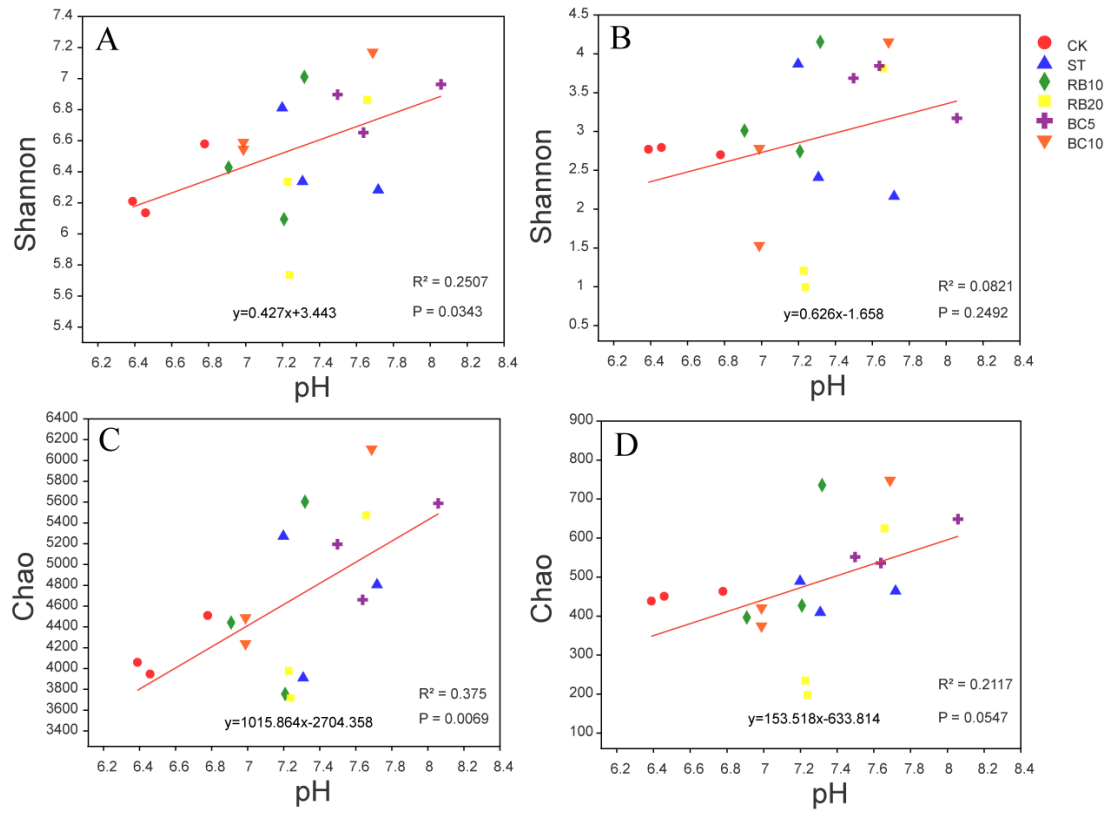

**Figure S3.** Ordinal regression analysis of alpha diversity and pH of soil bacterial (A, C) and fungal (B, D) communities.  $R^2$  is the coefficient of determination which represents the proportion of variation explained by the regression line. The larger the  $R^2$ , the higher the likelihood that pH influences the alpha diversity. The treatments are described in Figure S1.



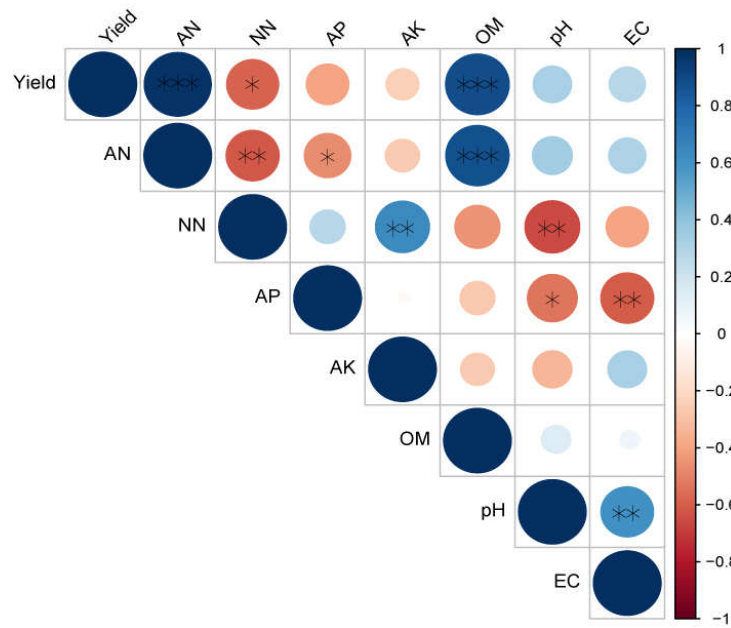

**Figure S4.** Correlation analysis between strawberry yield and soil physicochemical properties. Soil properties are defined in Table S2. Correlation analysis was performed using Spearman's rank correlation method. Blue represents a positive correlation and red represents a negative correlation. Significance levels: \*  $p < 0.05$ , \*\*  $p < 0.01$ , \*\*\*  $p < 0.001$ . Abbreviations: AN,  $\text{NH}_4^+\text{-N}$ ; NN,  $\text{NO}_3^-\text{-N}$ ; AP, available phosphorus; AK, available potassium; OM, organic matter; EC, electrical conductivity.

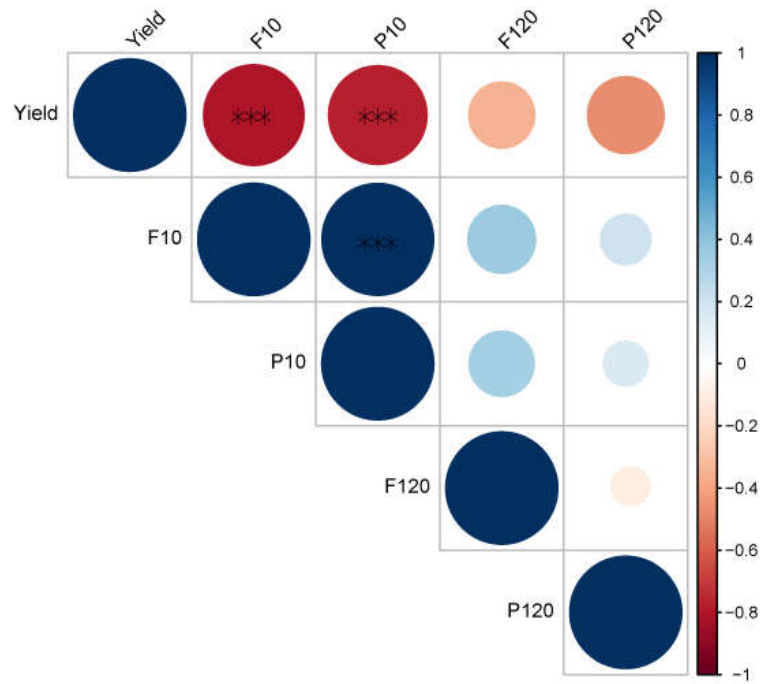

**Figure S5.** Correlation analysis between strawberry yield and soil-borne pathogens. Correlation analysis was performed using Spearman's rank correlation method. Blue represents a positive correlation and red represents a negative correlation. F10 = *Fusarium spp.* abundance 10 d after ASD; F120 = *Fusarium spp.* abundance 120 d after ASD; P10 = *Phytophthora spp.* abundance 10 d after ASD; P120 = *Phytophthora spp.* abundance 120 d after ASD. Significance levels: \*\*\*  $p < 0.001$ .
